# Supplementary material for: To Be a Flower or Fruiting Branch: Insights Revealed by mRNA and Small RNA Transcriptomes from Different Cotton Developmental Stages
Source: PubMed Central journal article supplement (PMC4794708; doi:10.1038/srep23212), 2016-03-17
Supplement: srep23212-s1.pdf [file srep23212-s1.pdf]

---

Supplementary Information

**Title:**

To Be a Flower or Fruiting Branch: Insights Revealed by mRNA and Small RNA Transcriptomes from Different Cotton Developmental Stages

**Author:**

Quan Sun<sup>1,2\*</sup>, Xiongming Du<sup>3\*</sup>, Chaowei Cai<sup>1</sup>, Lu Long<sup>1</sup>, Sai Zhang<sup>1</sup>, Peng Qiao<sup>1</sup>, Weina Wang<sup>2</sup>, Kexue Zhou<sup>1</sup>, Guanghao Wang<sup>1</sup>, Xin Liu<sup>1</sup>, Hui Zhang<sup>1</sup>, ShuaiPeng Geng<sup>1</sup>, Can Yang<sup>2</sup>, Wei Gao<sup>1</sup>, Jianchuan Mo<sup>1</sup>, Chen Miao<sup>1</sup>, Chunpeng Song<sup>1\*\*</sup>, Yingfan Cai<sup>1\*\*</sup>

\*\* Correspondence: [cyf@henu.edu.cn](mailto:cyf@henu.edu.cn), [songcp@henu.edu.cn](mailto:songcp@henu.edu.cn)

---

Supplemental Figure S1

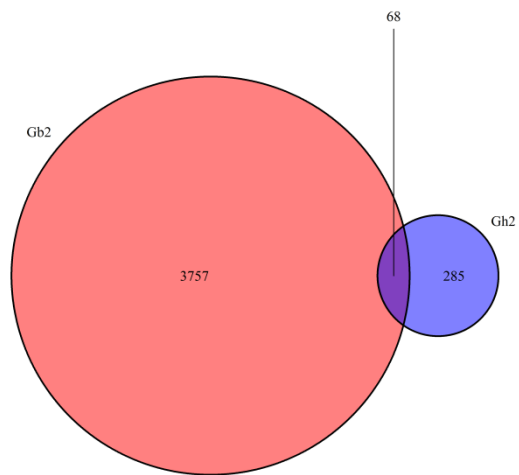

Supplemental Figure S1|Venn diagram analyses of pre-squaring stage specific expression genes in *G. barbadense* (Gb2) and *G. hirsutum* (Gh2).

## Supplemental Figure S2

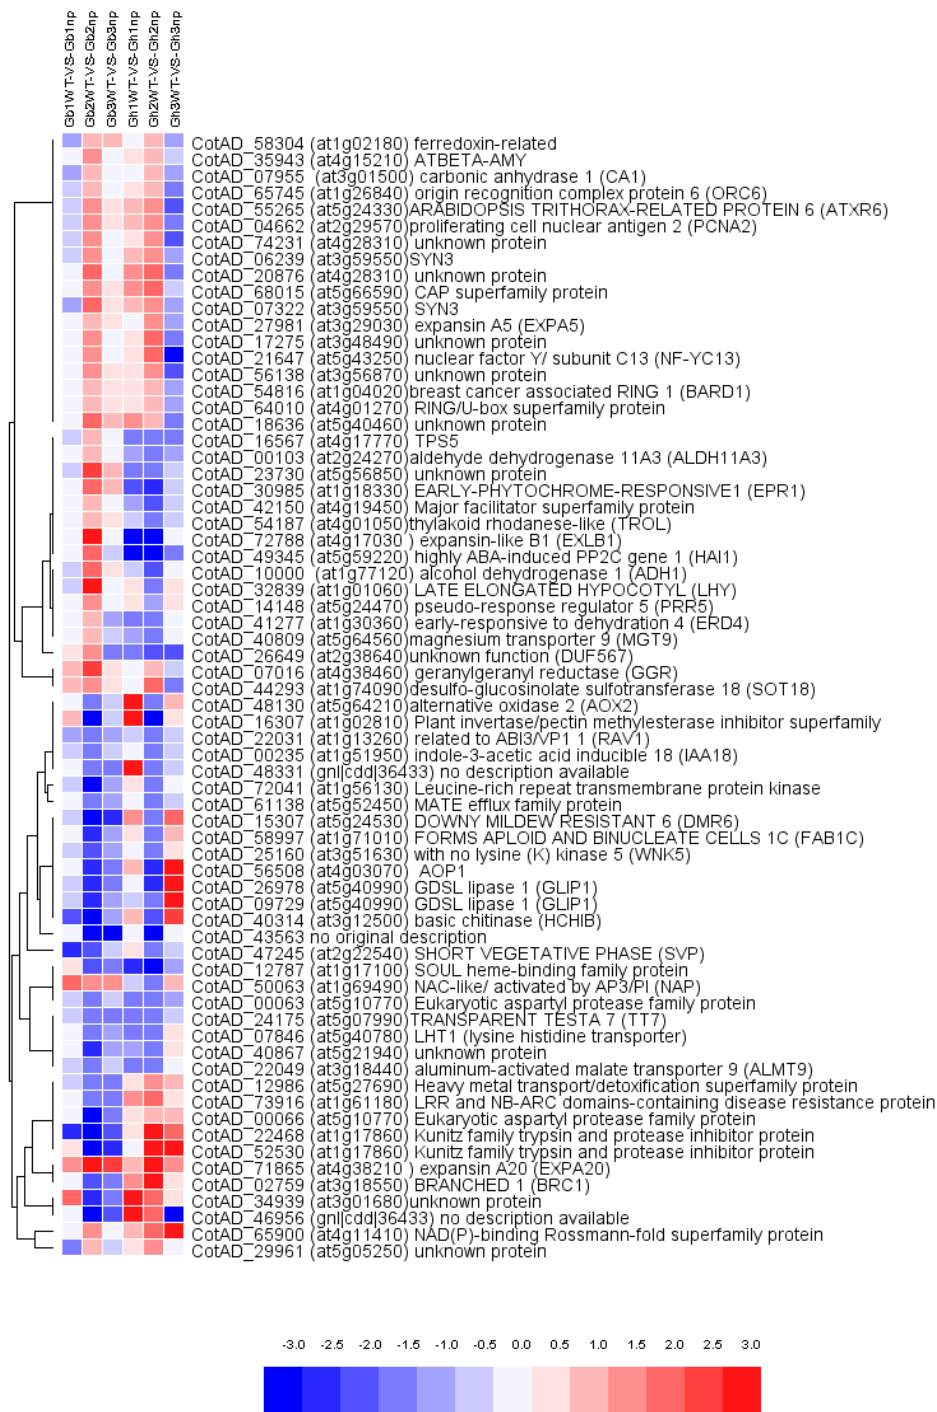

Supplemental Figure S2 | Expression profiles for stage-specific DEGs in square initiating stage both in *G. hirsutum* and *G. barbadense*. The bar show log<sub>2</sub> value of fold change.

---

Supplemental Figure S3

A

B

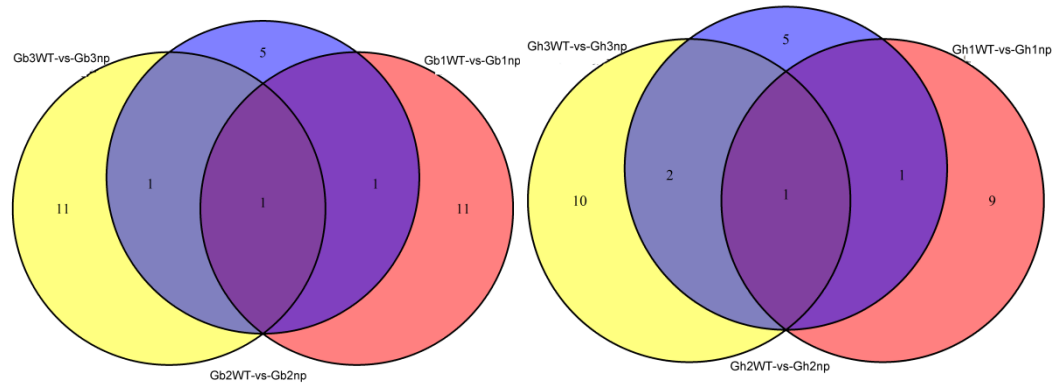

Supplemental Figure S3 | Venn diagram analyses of stage-specific expression novel miRNAs in *G. barbadense* (A) *G. hirsutum* (B).

Supplemental Figure S4

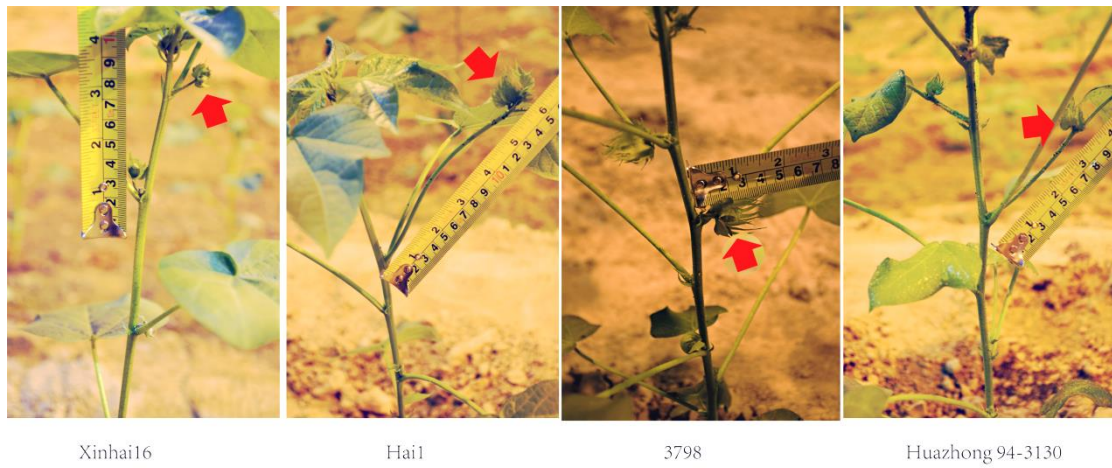

Supplemental Figure S4 | The buds grown in different positions of the plant for two different branch types of cotton, nulliplex-branch mutant: 3798 and Xinhai 16, wild type: Huazhong94-3130 and Hai 1

Supplemental Figure 5

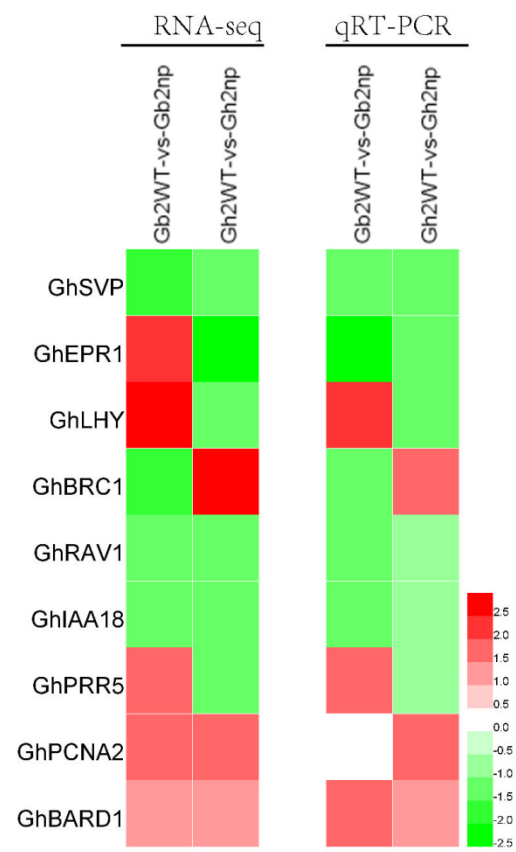

Supplemental Figure S5 | Confirmation of RNA-seq expression profiles with qPCR. Left showed expression ratios, as log<sub>2</sub> (fold change) for RNA-seq in six compared groups. Right showed the expression ratios, also as log<sub>2</sub> (fold change) for qRT-PCR in six compared groups.

Supplemental Table S1 | Raw data statistic of RNA-seq

| Samples | Total Raw Reads | Total Clean Reads | Total Clean Nucleotides (nt) | Q20 percentage | N percentage | GC percentage |
|---------|-----------------|-------------------|------------------------------|----------------|--------------|---------------|
| Gb1WT-1 | 55,582,284      | 52,864,154        | 4,757,773,860                | 98.33%         | 0.01%        | 44.23%        |
| Gb1WT-2 | 54,681,700      | 51,962,266        | 4,676,603,940                | 98.28%         | 0.01%        | 44.31%        |
| Gb1WT-3 | 55,823,910      | 53,033,216        | 4,772,989,440                | 98.32%         | 0.01%        | 44.41%        |
| Gb1np-1 | 58,571,526      | 53,135,140        | 4,782,162,600                | 98.18%         | 0.01%        | 44.24%        |
| Gb1np-2 | 57,387,014      | 54,464,656        | 4,901,819,040                | 98.32%         | 0.01%        | 44.37%        |
| Gb1np-3 | 54,024,896      | 51,414,774        | 4,627,329,660                | 98.32%         | 0.01%        | 44.15%        |
| Gb2WT-1 | 55,042,908      | 52,265,610        | 4,703,904,900                | 98.04%         | 0.01%        | 43.37%        |
| Gb2WT-2 | 58,489,636      | 55,355,962        | 4,982,036,580                | 97.97%         | 0.01%        | 43.51%        |
| Gb2WT-3 | 57,670,542      | 54,880,690        | 4,939,262,100                | 98.07%         | 0.01%        | 43.34%        |
| Gb2np-1 | 57,907,284      | 54,917,224        | 4,942,550,160                | 97.62%         | 0.01%        | 43.29%        |
| Gb2np-2 | 58,507,324      | 55,517,736        | 4,996,596,240                | 97.65%         | 0.01%        | 43.43%        |
| Gb2np-3 | 56,863,582      | 53,880,600        | 4,849,254,000                | 97.61%         | 0.01%        | 43.37%        |
| Gb3WT-1 | 57,576,230      | 54,971,746        | 4,947,457,140                | 98.14%         | 0.01%        | 43.89%        |
| Gb3WT-2 | 57,580,500      | 54,582,626        | 4,912,436,340                | 97.58%         | 0.01%        | 43.58%        |
| Gb3WT-3 | 54,580,784      | 51,652,392        | 4,648,715,280                | 97.56%         | 0.01%        | 43.59%        |
| Gb3np-1 | 56,264,006      | 53,801,290        | 4,842,116,100                | 98.21%         | 0.01%        | 43.60%        |
| Gb3np-2 | 53,761,796      | 51,352,526        | 4,621,727,340                | 98.15%         | 0.01%        | 43.61%        |
| Gb3np-3 | 54,397,962      | 51,872,336        | 4,668,510,240                | 98.15%         | 0.01%        | 43.51%        |
| Gh1WT-1 | 54,451,984      | 51,838,904        | 4,665,501,360                | 98.34%         | 0.01%        | 44.04%        |
| Gh1WT-2 | 56,360,552      | 53,534,544        | 4,818,108,960                | 98.29%         | 0.01%        | 44.46%        |
| Gh1WT-3 | 54,794,486      | 51,533,632        | 4,638,026,880                | 98.28%         | 0.01%        | 44.30%        |
| Gh1np-1 | 54,119,498      | 51,174,464        | 4,605,701,760                | 97.99%         | 0.01%        | 45.11%        |
| Gh1np-2 | 54,225,148      | 51,484,394        | 4,633,595,460                | 98.06%         | 0.01%        | 44.19%        |
| Gh1np-3 | 58,869,832      | 55,545,094        | 4,999,058,460                | 97.97%         | 0.01%        | 44.47%        |
| Gh2WT-1 | 54,118,698      | 51,215,100        | 4,609,359,000                | 97.63%         | 0.01%        | 43.38%        |
| Gh2WT-2 | 57,748,844      | 54,860,278        | 4,937,425,020                | 98.03%         | 0.01%        | 43.55%        |
| Gh2WT-3 | 58,154,564      | 55,324,496        | 4,979,204,640                | 98.03%         | 0.01%        | 43.49%        |
| Gh2np-1 | 57,105,044      | 54,029,086        | 4,862,617,740                | 97.56%         | 0.01%        | 43.39%        |
| Gh2np-2 | 59,847,754      | 54,979,614        | 4,948,165,260                | 97.54%         | 0.01%        | 43.55%        |
| Gh2np-3 | 53,905,896      | 51,163,388        | 4,604,704,920                | 97.65%         | 0.01%        | 43.41%        |
| Gh3WT-1 | 55,026,558      | 52,429,324        | 4,718,639,160                | 98.08%         | 0.01%        | 43.86%        |
| Gh3WT-2 | 55,881,492      | 53,145,738        | 4,783,116,420                | 98.07%         | 0.01%        | 43.57%        |
| Gh3WT-3 | 53,666,326      | 51,267,494        | 4,614,074,460                | 98.18%         | 0.01%        | 43.94%        |
| Gh3np-1 | 57,848,924      | 54,620,742        | 4,915,866,780                | 97.95%         | 0.01%        | 43.46%        |
| Gh3np-2 | 55,340,148      | 52,414,004        | 4,717,260,360                | 97.94%         | 0.01%        | 43.45%        |
| Gh3np-3 | 56,159,378      | 53,293,290        | 4,796,396,100                | 97.99%         | 0.01%        | 43.39%        |

Supplemental Table S2 | GO annotation of pre-squaring stage-specific DEG in *G.barbadense*

|          | Gene Ontology term                                                                      | Gene number | P-value  |
|----------|-----------------------------------------------------------------------------------------|-------------|----------|
|          | chloroplast                                                                             | 128(8.5%)   | 2.57E-16 |
|          | chloroplast part                                                                        | 124(8.2%)   | 8.80E-16 |
|          | thylakoid                                                                               | 125(8.3%)   | 1.05E-15 |
|          | chloroplast thylakoid                                                                   | 111(7.4%)   | 5.75E-15 |
|          | plastid thylakoid                                                                       | 113(7.5%)   | 4.84E-14 |
|          | organelle subcompartment                                                                | 113(7.5%)   | 6.15E-14 |
|          | photosynthetic membrane                                                                 | 46(3.0%)    | 2.32E-11 |
|          | photosystem                                                                             | 39(2.6%)    | 1.75E-10 |
|          | thylakoid part                                                                          | 50(3.3%)    | 1.22E-09 |
|          | chloroplast stroma                                                                      | 27(1.8%)    | 4.62E-09 |
| CC(1510) | plastid part                                                                            | 200(13.2%)  | 9.52E-09 |
|          | plastid                                                                                 | 377(25.0%)  | 1.02E-06 |
|          | plastid stroma                                                                          | 90(6.0%)    | 0.00058  |
|          | photosystem I                                                                           | 9(0.6%)     | 0.00309  |
|          | intrinsic to membrane                                                                   | 229(15.2%)  | 0.00321  |
|          | thylakoid light-harvesting complex                                                      | 4(0.3%)     | 0.00567  |
|          | external encapsulating structure                                                        | 96(6.4%)    | 0.01696  |
|          | nucleotide-excision repair complex                                                      | 3(0.2%)     | 0.02131  |
|          | plastid envelope                                                                        | 81(5.4%)    | 0.02328  |
|          | germ cell nucleus                                                                       | 4(0.3%)     | 0.03625  |
|          | anchored to membrane                                                                    | 20(1.3%)    | 0.04227  |
|          | tetrapyrrole binding                                                                    | 26(1.3%)    | 2.36E-07 |
|          | oxidoreductase activity, acting on CH or CH2 groups, disulfide as acceptor              | 8(0.4%)     | 2.36E-06 |
|          | hydrolase activity, acting on glycosyl bonds                                            | 104(5.1%)   | 4.38E-05 |
|          | oxidoreductase activity, acting on CH or CH2 groups                                     | 8(0.4%)     | 0.00243  |
|          | cofactor binding                                                                        | 90(4.4%)    | 0.00431  |
|          | oxidoreductase activity, acting on single donors with incorporation of molecular oxygen | 30(1.5%)    | 0.00437  |
| MF(2024) | DNA-directed RNA polymerase activity                                                    | 4(0.2%)     | 0.00455  |
|          | dioxygenase activity                                                                    | 36(1.8%)    | 0.0093   |
|          | carbon-carbon lyase activity                                                            | 37(1.8%)    | 0.02418  |
|          | oxidoreductase activity                                                                 | 340(16.8%)  | 0.02479  |
|          | hydrolase activity, hydrolyzing O-glycosyl compounds                                    | 69(3.4%)    | 0.04321  |
|          | transmembrane transporter activity                                                      | 165(8.2%)   | 0.0445   |
|          | nitrogen compound transport                                                             | 65(3.6%)    | 8.76E-09 |
|          | generation of precursor metabolites and energy                                          | 86(4.8%)    | 4.69E-08 |
|          | amide transport                                                                         | 31(1.7%)    | 1.98E-07 |
|          | response to radiation                                                                   | 104(5.8%)   | 9.68E-07 |
|          | photosynthesis                                                                          | 30(1.7%)    | 1.84E-06 |
|          | photosynthesis, light reaction                                                          | 28(1.6%)    | 2.71E-06 |
|          | response to light stimulus                                                              | 80(4.5%)    | 2.79E-06 |
|          | response to light intensity                                                             | 31(1.7%)    | 4.86E-06 |
|          | peptide transport                                                                       | 26(1.5%)    | 2.93E-05 |
| BP(1787) | response to abiotic stimulus                                                            | 183(10.2%)  | 5.93E-05 |
|          | photosynthetic electron transport chain                                                 | 20(1.1%)    | 0.00012  |
|          | response to stimulus                                                                    | 565(31.6%)  | 0.00037  |
|          | anion transport                                                                         | 46(2.6%)    | 0.00049  |
|          | glucan metabolic process                                                                | 47(2.6%)    | 0.00059  |
|          | polysaccharide metabolic process                                                        | 60(3.4%)    | 0.00076  |
|          | carbohydrate metabolic process                                                          | 122(6.8%)   | 0.00159  |
|          | response to red or far red light                                                        | 35(2.0%)    | 0.00462  |
|          | response to oxygen-containing compound                                                  | 72(4.0%)    | 0.00945  |
|          | response to far red light                                                               | 5(0.3%)     | 0.03695  |
|          | cellular carbohydrate metabolic process                                                 | 55(3.1%)    | 0.03749  |



---

Supplemental Table S3 | GO annotation of pre-squaring stage-specific DEG in *G. hirsutum*

|         | Gene Ontology term                                 | Gene number | P-value |
|---------|----------------------------------------------------|-------------|---------|
| MF(176) | sesquiterpene synthase activity                    | 5(2.8%)     | 0.00018 |
|         | carbon-oxygen lyase activity, acting on phosphates | 6(3.4%)     | 0.00022 |
|         | terpene synthase activity                          | 5(2.8%)     | 0.00096 |
|         | oxidoreductase activity                            | 45(25.6%)   | 0.00274 |
|         | iron ion binding                                   | 15(8.5%)    | 0.01118 |
|         | ion binding                                        | 53(30.1%)   | 0.01873 |
|         | amylase activity                                   | 4(2.3%)     | 0.03057 |
|         | carbon-oxygen lyase activity                       | 8(4.5%)     | 0.04376 |

Supplemental Table S4 | Statistical analysis of sequencing reads and distribution of small RNAs from twelve sRNA libraries in cotton

|                |          | Total    | Matched      | miRNA          | rRNA          | snRNA      | snoRNA     | tRNA         | unann          |
|----------------|----------|----------|--------------|----------------|---------------|------------|------------|--------------|----------------|
| <b>miGb1WT</b> | Uniqu(%) | 4474033  | 3039685(67)  | 31528(0.72)    | 45558(1.17)   | 1392(0.03) | 808(0.02)  | 5763(0.15)   | 4160090(90.25) |
|                | Total(%) | 12078303 | 9727581(80)  | 3655768(30.02) | 579837(4.75)  | 2836(0.02) | 1709(0.01) | 135522(1.11) | 6459510(53.1)  |
| <b>miGb1np</b> | Uniqu(%) | 4172688  | 2865411(68)  | 29108(0.66)    | 37979(0.98)   | 1347(0.04) | 759(0.02)  | 4997(0.13)   | 3786021(90.59) |
|                | Total(%) | 11585879 | 9557316(82)  | 3921513(33.86) | 401589(3.47)  | 2997(0.02) | 1619(0.01) | 99631(0.86)  | 5934357(51.19) |
| <b>miGb2WT</b> | Uniqu(%) | 4699514  | 3203195(68)  | 25890(0.55)    | 46080(1.11)   | 1569(0.04) | 899(0.02)  | 5783(0.14)   | 4284765(90.89) |
|                | Total(%) | 11418835 | 8813601(77)  | 987225(8.64)   | 810271(7.09)  | 3739(0.03) | 2907(0.02) | 163213(1.43) | 7663450(67.12) |
| <b>miGb2np</b> | Uniqu(%) | 4563616  | 3087176(67)  | 26342(0.6)     | 56194(1.53)   | 1603(0.04) | 970(0.03)  | 7255(0.19)   | 4135888(89.97) |
|                | Total(%) | 11824530 | 9262478(78)  | 1103724(9.33)  | 1119070(9.43) | 3701(0.03) | 3576(0.03) | 218339(1.84) | 7335940(62.1)  |
| <b>miGb3WT</b> | Uniqu(%) | 5840522  | 3983736(68)  | 35448(0.61)    | 36298(0.56)   | 2082(0.03) | 1154(0.02) | 5830(0.09)   | 5332433(91.38) |
|                | Total(%) | 11548644 | 8770452(75)  | 976855(8.44)   | 386402(3.35)  | 4694(0.04) | 2624(0.02) | 103323(0.89) | 8427033(72.97) |
| <b>miGb3np</b> | Uniqu(%) | 4251084  | 2847955(66)  | 25030(0.62)    | 54580(1.36)   | 1822(0.05) | 924(0.02)  | 7027(0.18)   | 3849375(90.33) |
|                | Total(%) | 11909011 | 9298965(78)  | 1276813(10.72) | 1104241(9.27) | 4954(0.04) | 3387(0.03) | 205191(1.72) | 7202315(60.47) |
| <b>miGh1WT</b> | Uniqu(%) | 5135991  | 4127043(80)  | 32802(0.59)    | 41372(0.78)   | 1341(0.02) | 735(0.01)  | 4812(0.09)   | 4672749(91.29) |
|                | Total(%) | 11802342 | 10331167(87) | 2397414(20.32) | 418142(3.54)  | 2706(0.02) | 1388(0.01) | 101884(0.86) | 7258829(61.48) |
| <b>miGh1np</b> | Uniqu(%) | 5081157  | 4053379(79)  | 33310(0.66)    | 36964(0.75)   | 1318(0.03) | 731(0.02)  | 4376(0.1)    | 4621375(90.87) |
|                | Total(%) | 12113952 | 10568966(87) | 2599202(21.49) | 357448(2.94)  | 2721(0.02) | 1397(0.01) | 104803(0.86) | 7331767(60.50) |
| <b>miGh2WT</b> | Uniqu(%) | 4693705  | 3774429(80)  | 25446(0.56)    | 50658(1.15)   | 1686(0.04) | 868(0.02)  | 6190(0.14)   | 4243476(90.11) |
|                | Total(%) | 12016249 | 10370737(86) | 1287205(10.71) | 1003192(8.35) | 3824(0.03) | 2511(0.02) | 188202(1.57) | 7382912(61.42) |
| <b>miGh2np</b> | Uniqu(%) | 4457930  | 3577845(80)  | 25424(0.55)    | 54198(1.04)   | 1651(0.03) | 859(0.02)  | 6407(0.13)   | 4008255(90.06) |
|                | Total(%) | 11546843 | 10029483(86) | 1200926(10.43) | 978732(8.48)  | 3779(0.03) | 2799(0.02) | 188002(1.63) | 7001306(60.65) |
| <b>miGh3WT</b> | Uniqu(%) | 6349325  | 5054794(79)  | 35520(0.57)    | 31028(0.38)   | 1564(0.02) | 770(0.01)  | 4017(0.05)   | 5804822(91.61) |
|                | Total(%) | 11505129 | 9748728(84)  | 765647(6.65)   | 240728(2.09)  | 3034(0.02) | 1173(0.01) | 45615(0.4)   | 8721796(75.79) |
| <b>miGh3np</b> | Uniqu(%) | 4715587  | 3775532(80)  | 24854(0.5)     | 48733(0.85)   | 1799(0.03) | 847(0.01)  | 6033(0.09)   | 4273328(91.28) |
|                | Total(%) | 11623897 | 10012854(86) | 1010827(8.69)  | 788646(6.82)  | 4785(0.04) | 2509(0.02) | 170575(1.47) | 7588006(65.16) |

Supplemental Table S5 | The stage-specific DEM at pre-squaring stage in *G.barbadense*

| miR_name   | Sequence                 | log2Ratio(miGb2np/miGb2WT) | P-value  | FDR      |
|------------|--------------------------|----------------------------|----------|----------|
| miR156c-3p | TGCTTACTTCTCTCTGTGCGGC   | -17.3452                   | 1.07E-05 | 0.000205 |
| miR5298d   | TGGGATGGTTGAAATGAAAAA    | -16.4595                   | 0.000405 | 0.005034 |
| miR482d    | TTTCCTATGCCCCCATTCCAC    | 17.53683                   | 4.36E-06 | 9.34E-05 |
| miR2913    | GTAGGTCGGGGATGCAAGTTGGAG | -17.8921                   | 4.78E-07 | 1.15E-05 |
| miR7496a   | ATGACCAAATTGATAGAATGTGTA | -16.9319                   | 7.69E-05 | 0.001287 |
| miR5072    | CGTTCGCCAGCGGAGTCGCCA    | 16.821                     | 0.000119 | 0.001767 |
| miR4354    | CAACTCTGGATGGTCCAAAGCGGC | -16.8276                   | 0.000112 | 0.001729 |
| miR5537    | TATGTTTTTAGGATCGTTGT     | 19.1318                    | 5.00E-11 | 2.14E-09 |
| miR4393b   | TTGAAAAGGGATACAGATGACGC  | -19.5048                   | 2.37E-12 | 1.30E-10 |
| miR5150-3p | AGCAGCTGCAGATCGTCAGAAGTC | -17.0137                   | 5.98E-05 | 0.001046 |
| miR5293    | GATGAAGGTAGAAGGAACAGAAGA | 4.970722                   | 4.32E-05 | 0.000793 |
| miR5291a   | GTTGAGGATGGATTTGGATGGGTG | -16.6434                   | 0.000211 | 0.003006 |
| miR862-3p  | ATATGTGAGATGCTGACTTGAAGA | -16.5445                   | 0.000301 | 0.00399  |
| miR1077-5p | TTGAAGTGTTCGGATCGCGGC    | 22.57754                   | 1.03E-25 | 1.32E-23 |
| miR156i-3p | TGCTCACTTCTCTCTGTGTCAGC  | 17.38975                   | 8.96E-06 | 0.000181 |
| miR171c-5p | ATTGGTGCGGTTCAATCAGAT    | 17.68036                   | 1.76E-06 | 3.98E-05 |

Supplemental Table S6 | The stage-specific DEM at pre-squaring stage in *G. hirsutum*

| miR_name    | sequence                 | log2Ratio(miGh2np/miGh2WT) | P-value  | FDR      |
|-------------|--------------------------|----------------------------|----------|----------|
| miR166c     | TATATGATCTCGGACCAGGCT    | -19.4183                   | 6.60E-09 | 3.80E-07 |
| miR1520f-3p | AACCAGACAGTGACACATGACATA | -16.5558                   | 0.000382 | 0.006154 |
| miR5210     | TAGGAATGTTAGGATATTAAGGTT | -6.85011                   | 1.91E-05 | 0.000454 |
| miR4354     | CAACTCTGGATGGTCCAAAGCGGC | -16.5785                   | 0.000383 | 0.006154 |
| miR2619b-5p | TATGTTTTGGATTATCTTATGGCA | -16.4968                   | 0.000553 | 0.007965 |
| miR5672     | CAGGGTAGTGGAAGCAATTGCGA  | -18.8299                   | 1.04E-07 | 4.21E-06 |
| miR398b-5p  | TGAGTTGCCTATAGAACACACGGT | 11.78364                   | 8.90E-26 | 3.59E-23 |
| miR832-5p   | TACTGGTGGTCGGGAATGAAA    | 17.32932                   | 2.54E-05 | 0.000569 |
| miR7804-5p  | AGTGAGTGTCTGATCGAATCGAAT | 20.83867                   | 4.59E-13 | 4.63E-11 |
| miR5054     | GTTTCCACGACGGCGCCA       | 20.69966                   | 1.61E-12 | 1.30E-10 |
| miR8613     | ATCAAAGTTGGATGACTGTTGGTG | 18.65141                   | 1.64E-07 | 6.03E-06 |
| miR1119     | CGAGCACGGCGTACTTGTTCAG   | -16.5858                   | 0.000412 | 0.006154 |
| miR8710a    | ATACATCGAACTTTCTCCACA    | 17.4994                    | 1.36E-05 | 0.000341 |
| miR4249     | TGATTTTGAGAAGTATGATGGGA  | 16.96606                   | 8.45E-05 | 0.00148  |
| miR6475     | TCTTGAGACAAGCAAAGAACAC   | -22.4831                   | 2.87E-19 | 5.77E-17 |
| miR2950-5p  | TTCCATCTCTTGCACACTGGA    | -17.7163                   | 7.68E-06 | 0.000238 |
| miR1510a-3p | CGGTAGGATCAGGTAAATCAAC   | -16.5906                   | 0.000406 | 0.006154 |
| miR5137     | AGCGGAGAAGATCGTTTGGT     | 17.25097                   | 3.50E-05 | 0.000742 |

Supplement Table S7 | The list of DEGs enriched in two KEGG pathways. The up- or down-regulation information of the DEGs were showed in supplements data set 2 and 5.

|                                   | The enriched DEGs Gene ID in Gb2WT-vs-Gb2np |              |              |              | The enriched DEGs Gene ID in Gh2WT-vs-Gj2e |              |              |
|-----------------------------------|---------------------------------------------|--------------|--------------|--------------|--------------------------------------------|--------------|--------------|
| Circadian rhythm - plant          | CotAD_50720,                                | CotAD_76632, | CotAD_49060, | CotAD_46528, | CotAD_06187,                               | CotAD_07275, | CotAD_25160, |
|                                   | CotAD_73020,                                | CotAD_55573, | CotAD_72073, | CotAD_65971, | CotAD_38632,                               | CotAD_14148, | CotAD_62384, |
|                                   | CotAD_33120,                                | CotAD_18936, | CotAD_08025, | CotAD_57339, | CotAD_32839,                               | CotAD_32848, | CotAD_17833, |
|                                   | CotAD_35151,                                | CotAD_25160, | CotAD_61351, | CotAD_46346, | CotAD_47983,                               | CotAD_30985, | CotAD_33647  |
|                                   | CotAD_12196,                                | CotAD_74351, | CotAD_02653, | CotAD_15306, |                                            |              |              |
|                                   | CotAD_32794,                                | CotAD_58236, | CotAD_01991, | CotAD_14148, |                                            |              |              |
|                                   | CotAD_22354,                                | CotAD_57061, | CotAD_72318, | CotAD_43458, |                                            |              |              |
|                                   | CotAD_16644,                                | CotAD_69870, | CotAD_41425, | CotAD_33121, |                                            |              |              |
|                                   | CotAD_63670,                                | CotAD_17426, | CotAD_43235, | CotAD_34322, |                                            |              |              |
|                                   | CotAD_32839,                                | CotAD_17833, | CotAD_11091, | CotAD_39072, |                                            |              |              |
|                                   | CotAD_30985,                                | CotAD_10813, | CotAD_11502, | CotAD_30473  |                                            |              |              |
| Plant hormone signal transduction | CotAD_40334,                                | CotAD_46528, | CotAD_04225, | CotAD_28563, |                                            |              |              |
|                                   | CotAD_47590,                                | CotAD_08378, | CotAD_49470, | CotAD_12194, |                                            |              |              |
|                                   | CotAD_58021,                                | CotAD_06880, | CotAD_66459, | CotAD_22035, |                                            |              |              |
|                                   | CotAD_31752,                                | CotAD_54679, | CotAD_53169, | CotAD_45995, |                                            |              |              |
|                                   | CotAD_75512,                                | CotAD_08769, | CotAD_18778, | CotAD_40223, |                                            |              |              |
|                                   | CotAD_28570,                                | CotAD_73159, | CotAD_74752, | CotAD_27412, |                                            |              |              |
|                                   | CotAD_38579,                                | CotAD_60775, | CotAD_32908, | CotAD_38332, |                                            |              |              |
|                                   | CotAD_14880,                                | CotAD_06689, | CotAD_15901, | CotAD_73761, |                                            |              |              |
|                                   | CotAD_46420,                                | CotAD_29622, | CotAD_11634, | CotAD_23642, |                                            |              |              |
|                                   | CotAD_60230,                                | CotAD_22796, | CotAD_03487, | CotAD_15422, |                                            |              |              |
|                                   | CotAD_31462,                                | CotAD_25921, | CotAD_44751, | CotAD_53340, |                                            |              |              |
|                                   | CotAD_29302,                                | CotAD_49903, | CotAD_60363, | CotAD_22235, |                                            |              |              |
|                                   | CotAD_48099,                                | CotAD_13396, | CotAD_03390, | CotAD_19194, |                                            |              |              |
|                                   | CotAD_11283,                                | CotAD_02433, | CotAD_33068, | CotAD_23314, |                                            |              |              |
|                                   | CotAD_12135,                                | CotAD_28222, | CotAD_67654, | CotAD_51639, |                                            |              |              |
|                                   | CotAD_12195,                                | CotAD_59532, | CotAD_38414, | CotAD_54549, |                                            |              |              |
|                                   | CotAD_01401,                                | CotAD_32794, | CotAD_08177, | CotAD_37030, |                                            |              |              |
|                                   | CotAD_75152,                                | CotAD_57941, | CotAD_01991, | CotAD_45308, |                                            |              |              |
|                                   | CotAD_08638,                                | CotAD_44201, | CotAD_73075, | CotAD_63351, |                                            |              |              |
|                                   | CotAD_00235,                                | CotAD_38248, | CotAD_01782, | CotAD_26378, |                                            |              |              |
|                                   | CotAD_58763,                                | CotAD_07126, | CotAD_00351, | CotAD_36426, |                                            |              |              |
|                                   | CotAD_11769,                                | CotAD_76883, | CotAD_62019, | CotAD_62689, |                                            |              |              |
|                                   | CotAD_30952,                                | CotAD_24033, | CotAD_50337, | CotAD_62680, |                                            |              |              |
|                                   | CotAD_40567,                                | CotAD_72038, | CotAD_46354, | CotAD_22354, |                                            |              |              |
|                                   | CotAD_67648,                                | CotAD_31477, | CotAD_65545, | CotAD_65385, |                                            |              |              |
|                                   | CotAD_03246,                                | CotAD_72318, | CotAD_17676, | CotAD_43458, |                                            |              |              |
|                                   | CotAD_08759,                                | CotAD_18479, | CotAD_57227, | CotAD_17677, |                                            |              |              |
|                                   | CotAD_59480,                                | CotAD_46553, | CotAD_42073, | CotAD_08312, |                                            |              |              |

---

CotAD\_10815, CotAD\_06020, CotAD\_03674, CotAD\_14446,  
CotAD\_24929, CotAD\_52110, CotAD\_51284, CotAD\_39394,  
CotAD\_13230, CotAD\_09484, CotAD\_59180, CotAD\_02227,  
CotAD\_24101, CotAD\_41051, CotAD\_72124, CotAD\_00437,  
CotAD\_76936, CotAD\_52763, CotAD\_66141, CotAD\_52240,  
CotAD\_04030, CotAD\_08052, CotAD\_60541, CotAD\_21144,  
CotAD\_08185, CotAD\_61426, CotAD\_22336, CotAD\_07492,  
CotAD\_49856, CotAD\_12777, CotAD\_48610, CotAD\_21002,  
CotAD\_49347, CotAD\_27610, CotAD\_53606, CotAD\_06730,  
CotAD\_25220, CotAD\_01629, CotAD\_46619, CotAD\_09189,  
CotAD\_04601, CotAD\_71538, CotAD\_08178, CotAD\_15363,  
CotAD\_06191, CotAD\_61030, CotAD\_30274, CotAD\_05763,  
CotAD\_24283, CotAD\_62484, CotAD\_31119, CotAD\_23855,  
CotAD\_00601, CotAD\_06195, CotAD\_70072, CotAD\_07267,  
CotAD\_26121, CotAD\_37900, CotAD\_25036, CotAD\_73314,  
CotAD\_06519, CotAD\_75522, CotAD\_46547, CotAD\_33008,  
CotAD\_20318, CotAD\_36190, CotAD\_00678, CotAD\_24719,  
CotAD\_30011, CotAD\_42357, CotAD\_15514, CotAD\_40683,  
CotAD\_53107, CotAD\_00254, CotAD\_57715, CotAD\_56144,  
CotAD\_21748, CotAD\_66464, CotAD\_73762, CotAD\_04028,  
CotAD\_36136, CotAD\_03511, CotAD\_35956, CotAD\_09190,  
CotAD\_70718, CotAD\_03678, CotAD\_09712, CotAD\_49345,  
CotAD\_49340, CotAD\_61162, CotAD\_68755, CotAD\_43399,  
CotAD\_63886, CotAD\_28560, CotAD\_26249, CotAD\_53834,  
CotAD\_39116, CotAD\_63222, CotAD\_69885, CotAD\_24117,  
CotAD\_72113, CotAD\_49211, CotAD\_03587, CotAD\_26342,  
CotAD\_19840, CotAD\_35534, CotAD\_51741, CotAD\_08455,  
CotAD\_66289, CotAD\_04243, CotAD\_00052, CotAD\_49859,  
CotAD\_54965, CotAD\_61114, CotAD\_51911, CotAD\_16791,  
CotAD\_75181, CotAD\_51823, CotAD\_64512, CotAD\_13381,  
CotAD\_12824, CotAD\_62983, CotAD\_40163, CotAD\_29392,  
CotAD\_68015, CotAD\_12136, CotAD\_51754, CotAD\_52307,  
CotAD\_32099, CotAD\_38161, CotAD\_67655, CotAD\_08053,  
CotAD\_36698, CotAD\_15257, CotAD\_08054, CotAD\_09551,  
CotAD\_26207, CotAD\_66463, CotAD\_38660, CotAD\_14404,  
CotAD\_51326, CotAD\_60007, CotAD\_23287, CotAD\_34103,  
CotAD\_12670, CotAD\_52244, CotAD\_19985, CotAD\_30961,  
CotAD\_41794, CotAD\_62272, CotAD\_18245, CotAD\_76838,  
CotAD\_03886, CotAD\_33377, CotAD\_02542

---

---

## Supplement Table S8 | The primers list of DEGs used for qRT-PCR

---

| Gene name | Gene ID or<br>Genebank ID | Forward primer           | Reverse primer         |
|-----------|---------------------------|--------------------------|------------------------|
| GhIAA18   | CotAD_00235               | TTTCTAAAGACACCAAGGAGGAG  | GAGGCATCTGGATCAGCAGT   |
| GhBRC1    | CotAD_02759               | GACATCCGAGACCGAAGTGG     | TTTCCCGTGCCTTACCCTC    |
| GhPCNA2   | CotAD_04662               | GATGATGAAATGTGCTGGTA     | TGATACTCTGCCTCTGGAA    |
| GhPRR5    | CotAD_14148               | CACATTTACCCTACCACCG      | ATCGTCGTTCTTGCTGTC     |
| GhRAV1    | CotAD_22031               | AAGCAGCATAGATGAAAGCACACA | GCGGTAGAGGGAGTCAGGAG   |
| GhEPR1    | CotAD_30985               | TACCGCCTCCTCGTCCTA       | CCCATTGCGTCAGATAAA     |
| GhLHY     | CotAD_32839               | GATGGAAGCCCAGGAACA       | TCGCCCATAGGGTGAAAT     |
| GhSVP     | CotAD_47245               | CCTCAAAAGGAAGGAAGTAGA    | GGTAAGGTAACCCAGTCTAA   |
| GhBARD1   | CotAD_54816               | ATCAAGCATCCCTCAGCC       | TGTCCCATAGTTCAACCTC    |
| Actin     | AY305733                  | ATCCTCCGTCCTTGACCTTG     | TGTCGTCAGGCAACTCAT     |
| UBQ7      | DQ116441                  | GAAGGCATTCCACCTGACCAAC   | CTTGACCTTCTTCTTGTGCTTG |

---

---

Legend of supplementary Data set S1-S13

Supplement Data set S1 | The list of DEGs in compared group Gb1WT versus Gb1np.

Supplement Data set S2 | The list of DEGs in compared group Gb2WT versus Gb2np.

Supplement Data set S3 | The list of DEGs in compared group Gb3WT versus Gb3np.

Supplement Data set S4 | The list of DEGs in compared group Gh1WT versus Gh1np.

Supplement Data set S5 | The list of DEGs in compared group Gh2WT versus Gh2np.

Supplement Data set S6 | The list of DEGs in compared group Gh3WT versus Gh3np.

Supplement Data set S7 | The expression pattern of miRNA

Supplement Data set S8 | The list of DEMs in compared group Gb1WT versus Gb1np.

Supplement Data set S9 | The list of DEMs in compared group Gb2WT versus Gb2np.

Supplement Data set S10 | The list of DEMs in compared group Gb3WT versus Gb3np.

Supplement Data set S11 | The list of DEMs in compared group Gh1WT versus Gh1np.

Supplement Data set S12 | The list of DEMs in compared group Gh2WT versus Gh2np.

Supplement Data set S13 | The list of DEMs in compared group Gh3WT versus Gh3np.
